# Supplementary material
Source: PubMed Central journal article supplement (PMC5341796)

**Figure 1b**

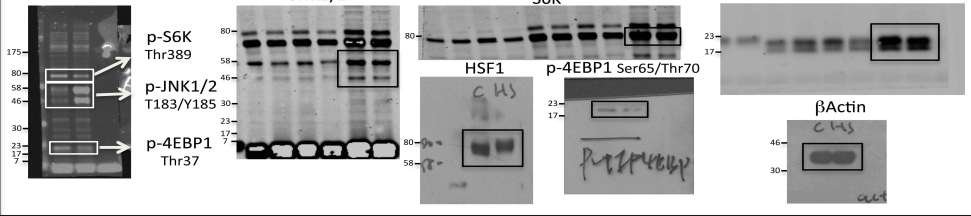

**Figure 1c**

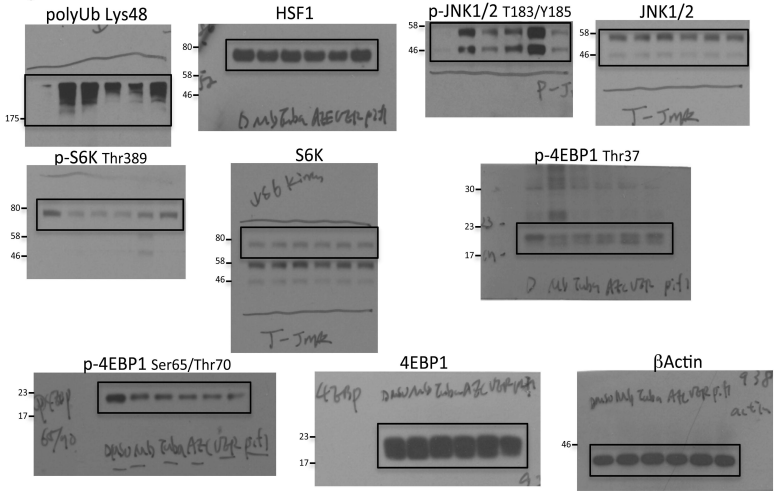

**Figure 1h**

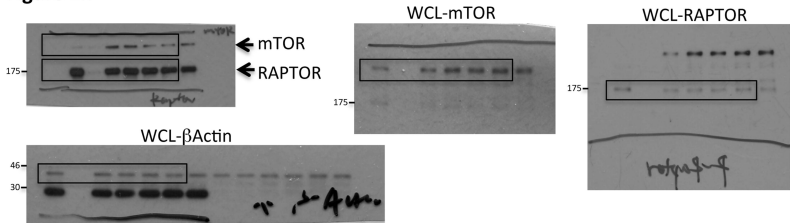

**Figure 1i**

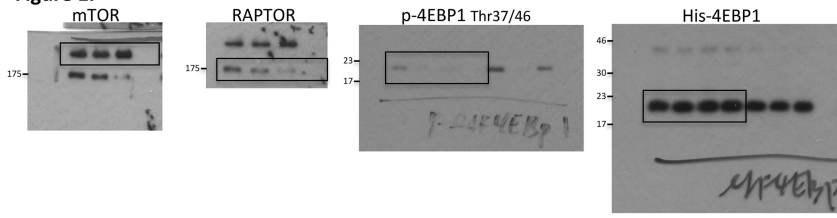

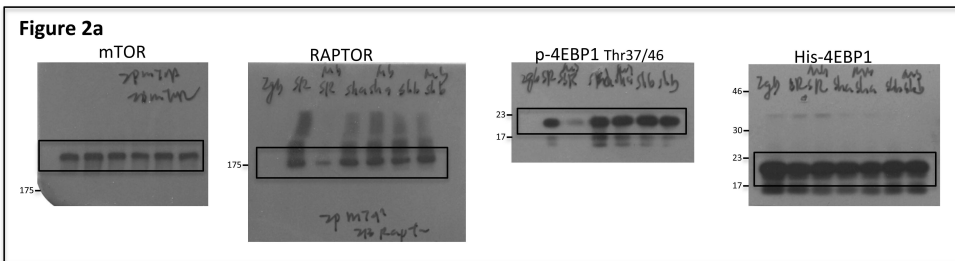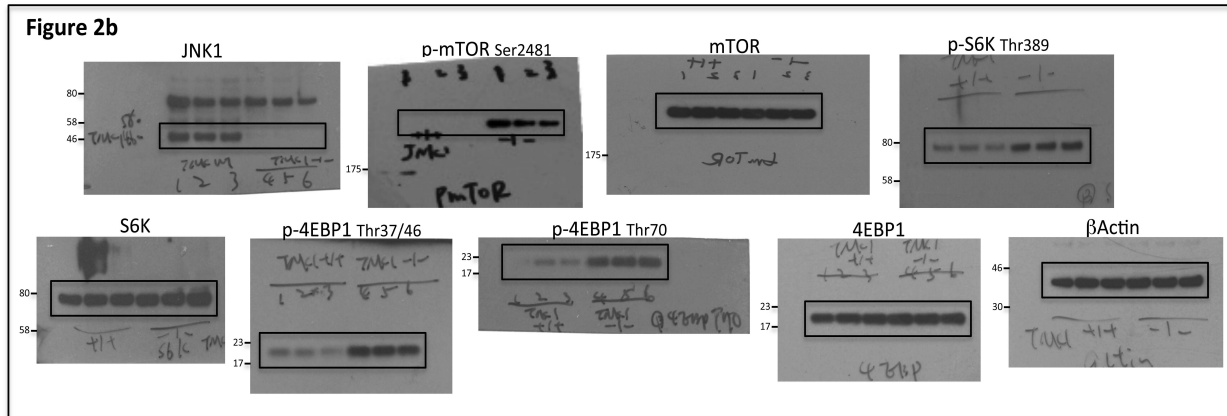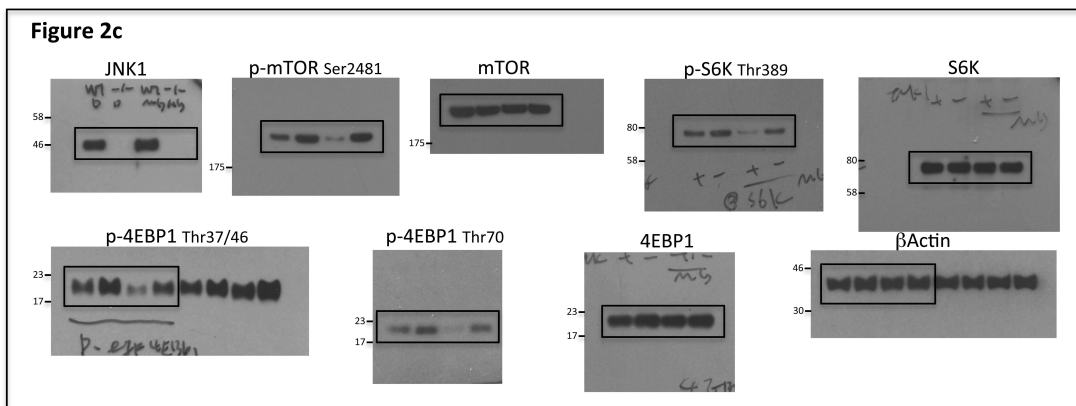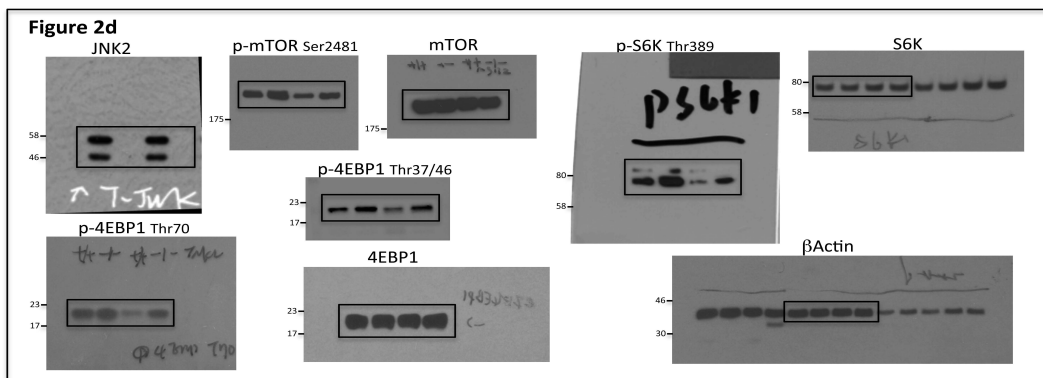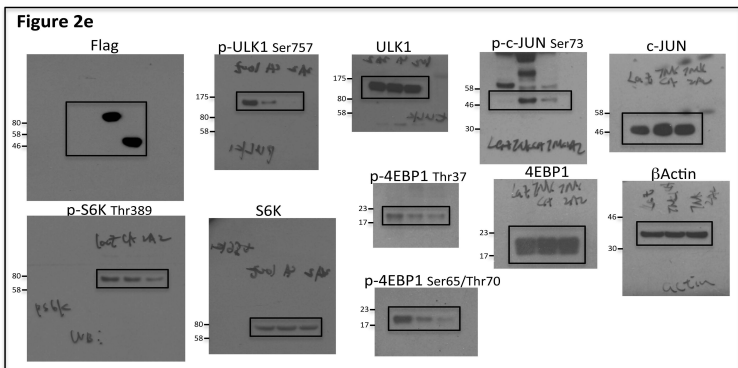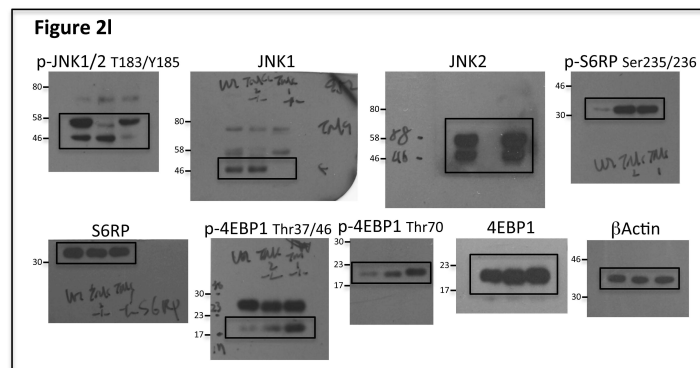

**Figure 3a**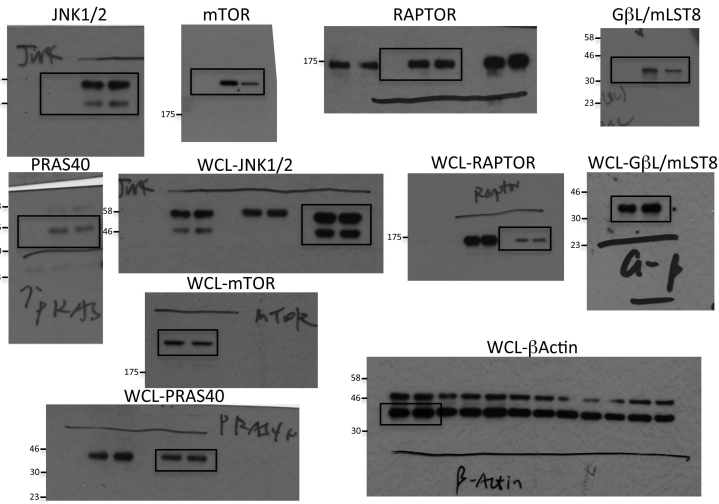**Figure 3e**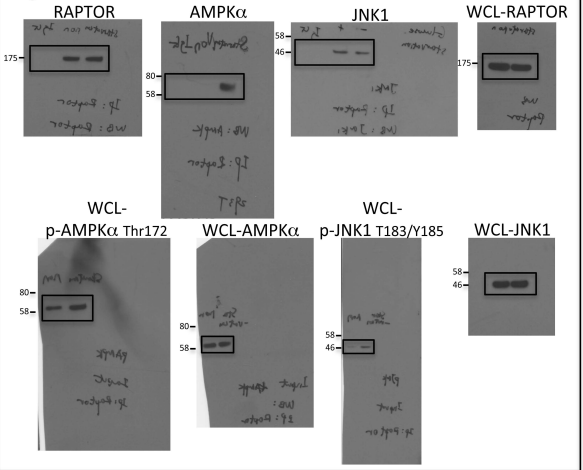**Figure 3b**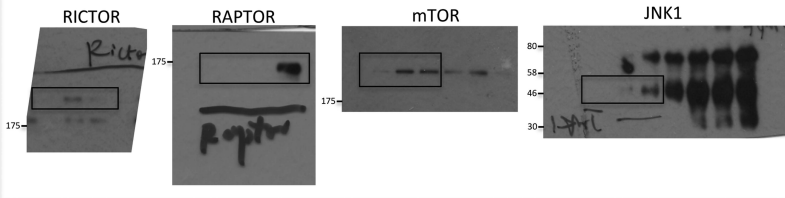**Figure 3i**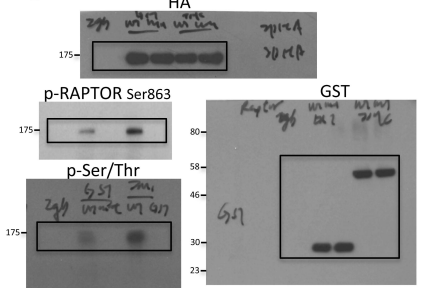**Figure 3f**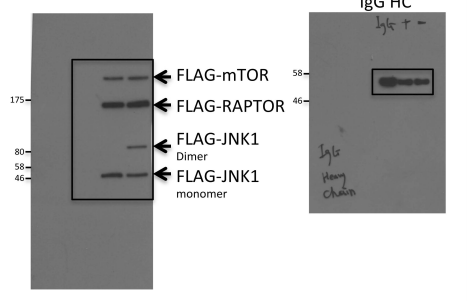**Figure 3j**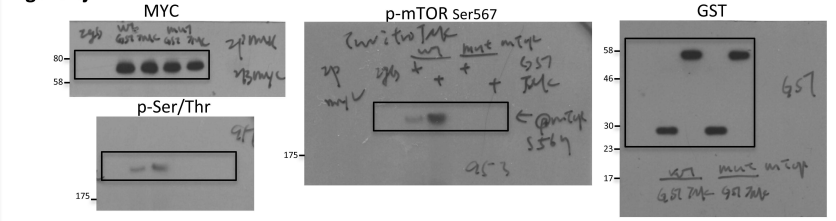**Figure 3g**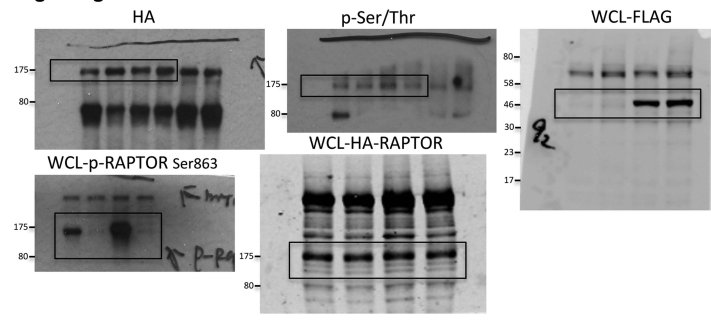**Figure 3h**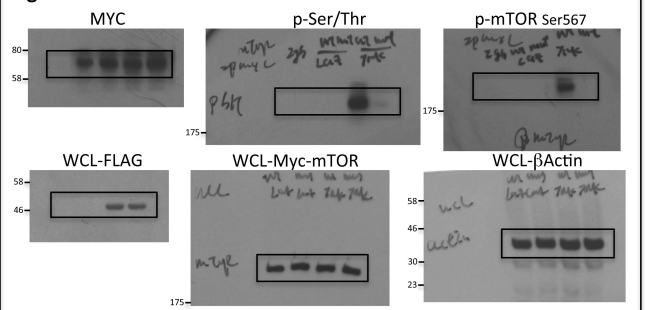**Figure 3k**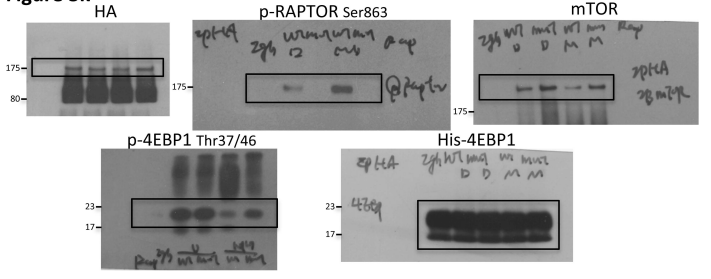**Figure 3l**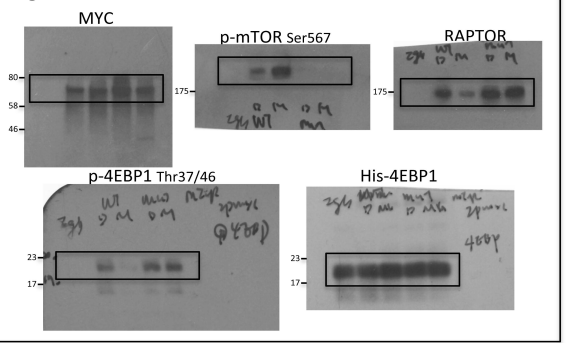

**Figure 4a**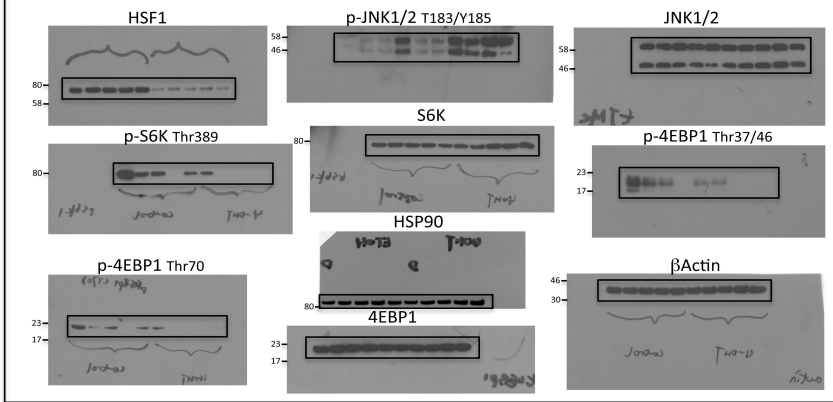**Figure 4c**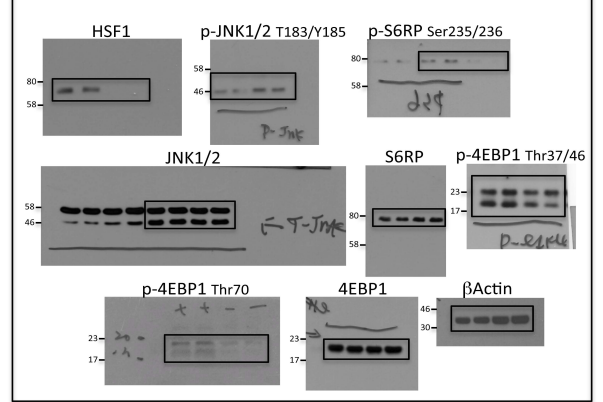**Figure 4b**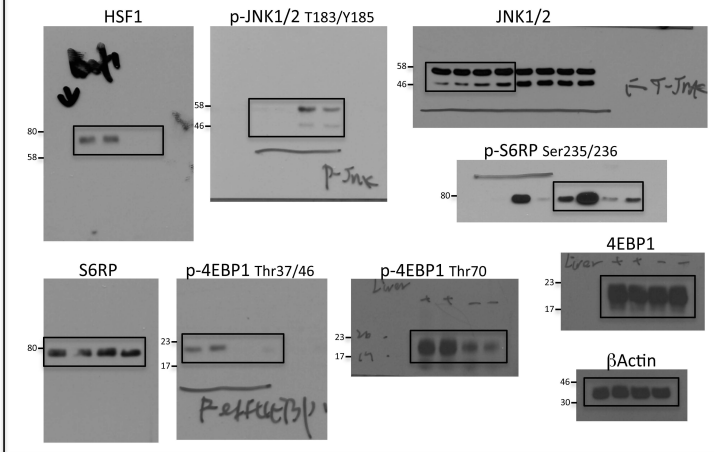**Figure 4d**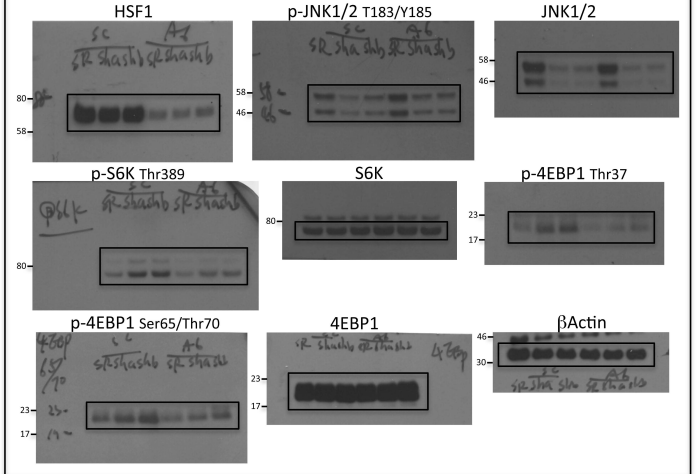**Figure 4e**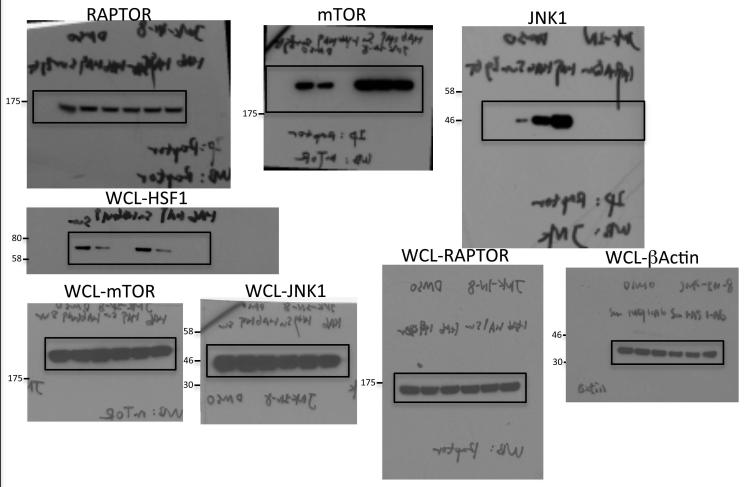**Figure 4f**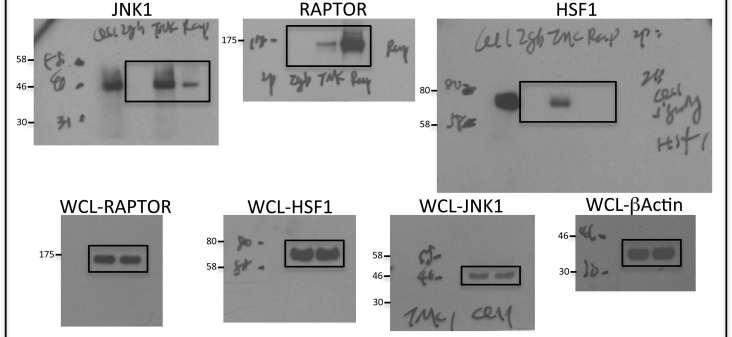



Figure 5a

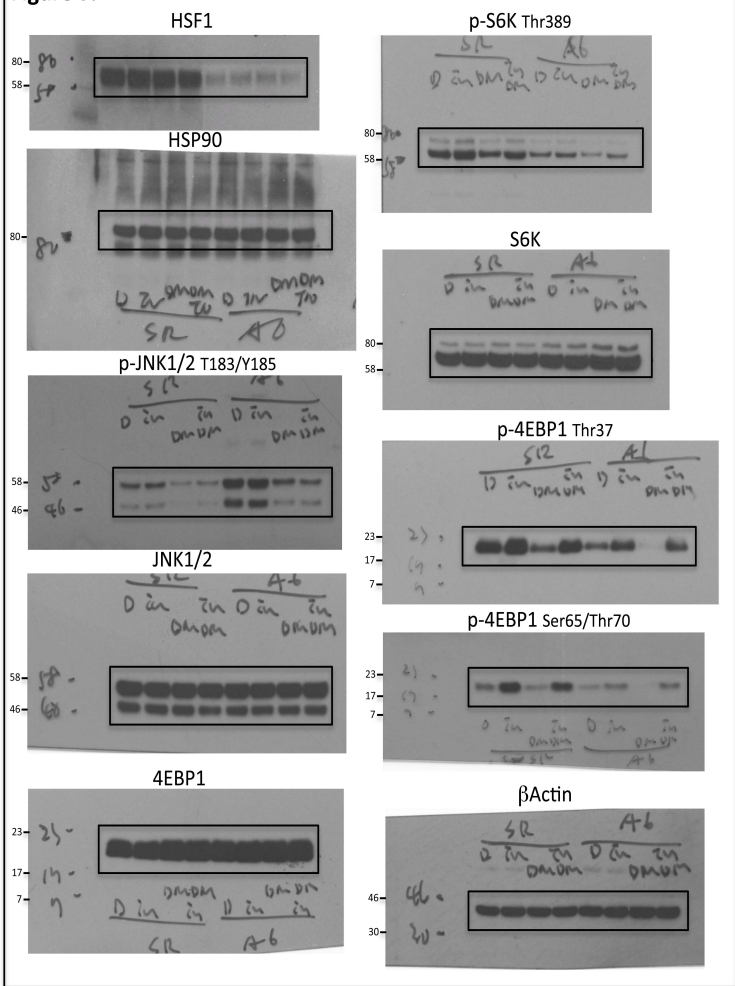

Figure 5b

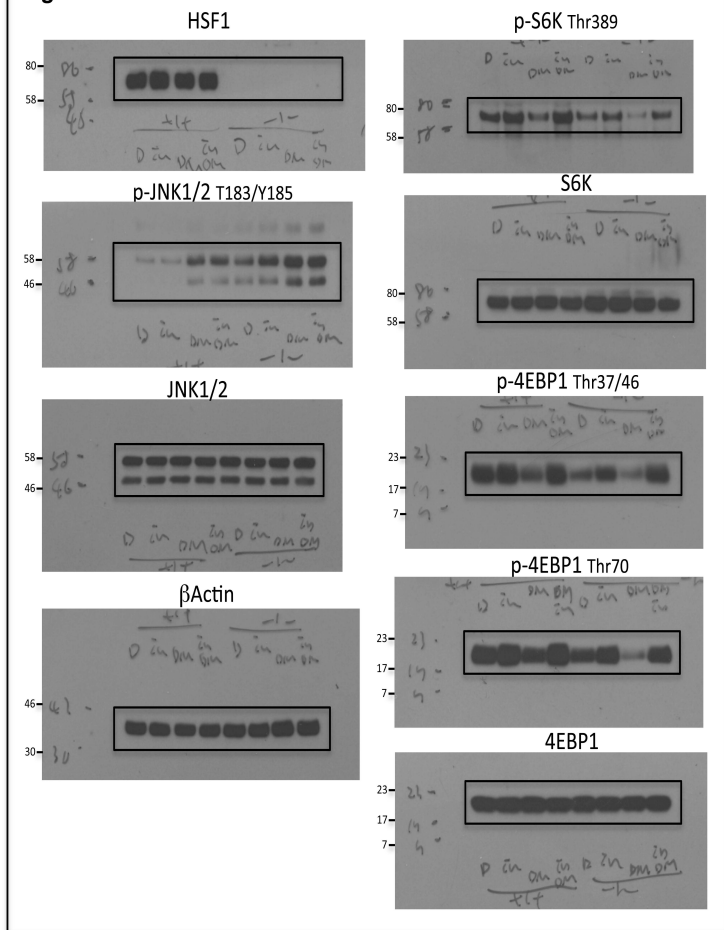

Figure 5e

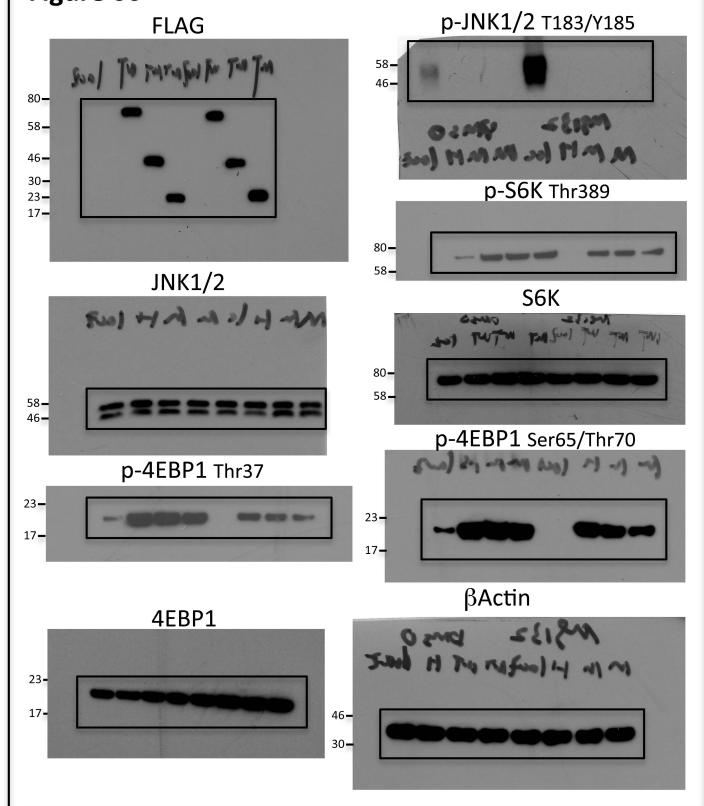

Figure 5f

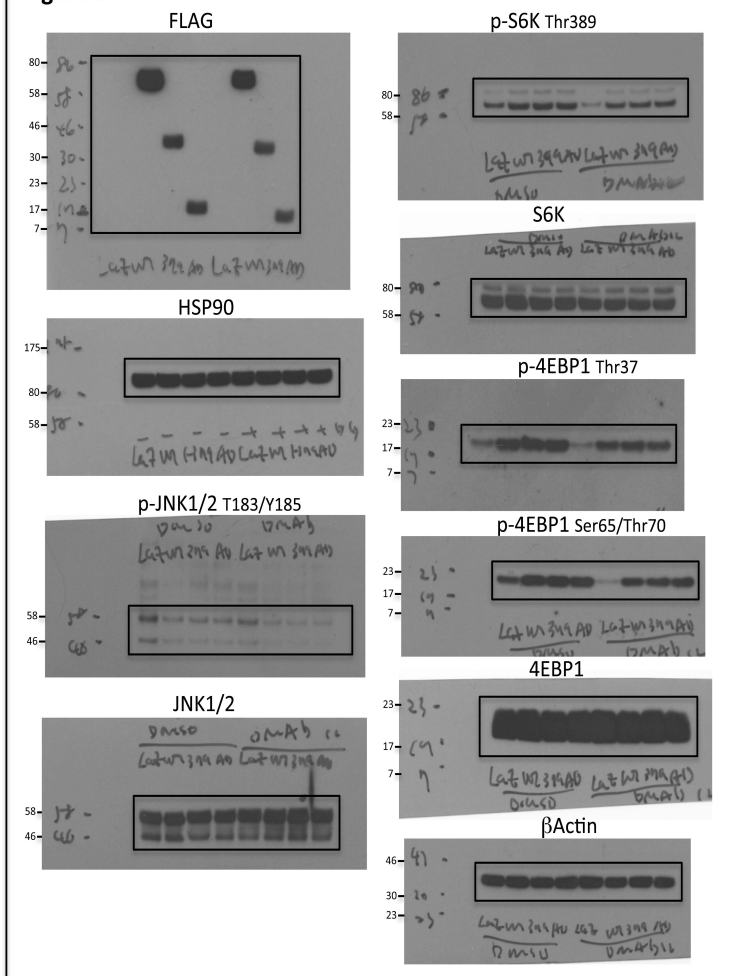

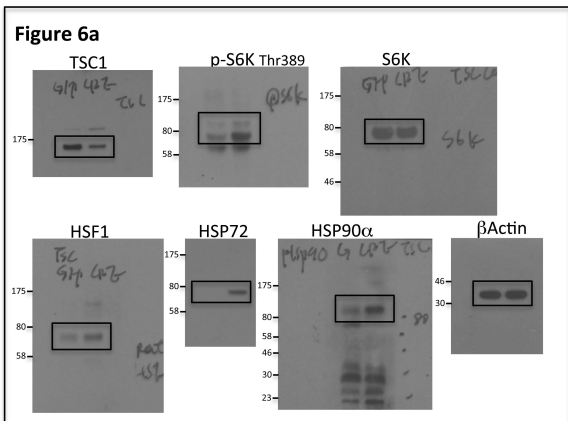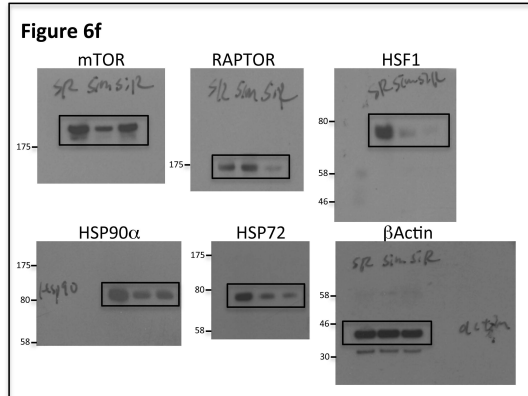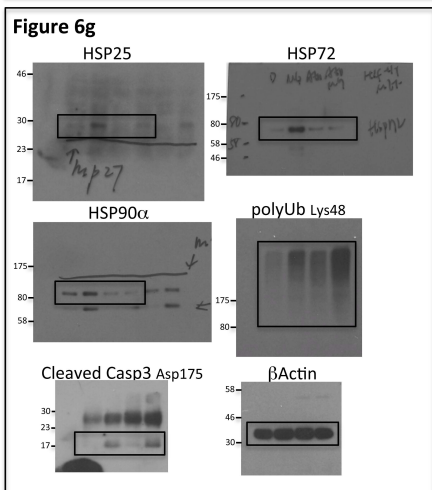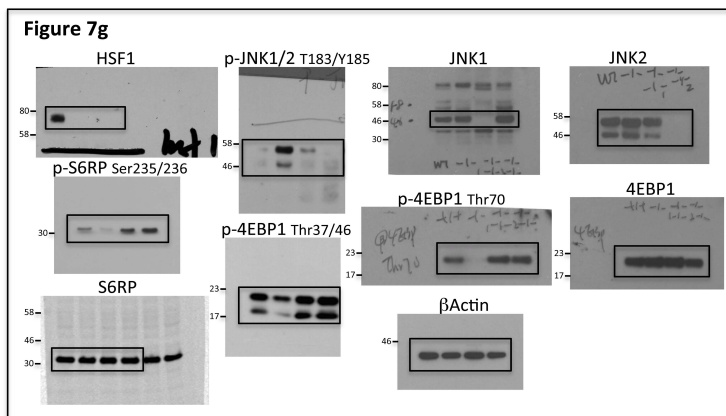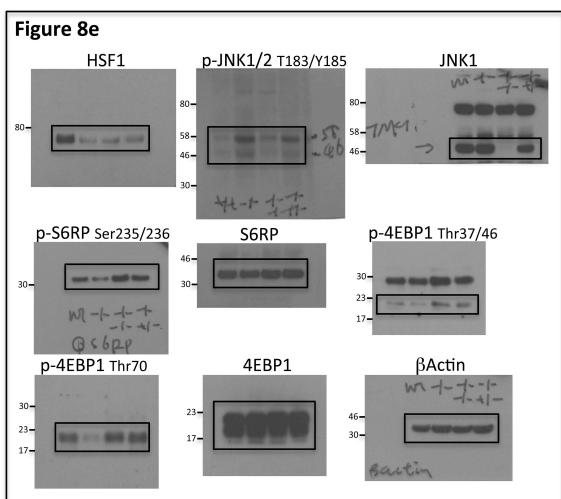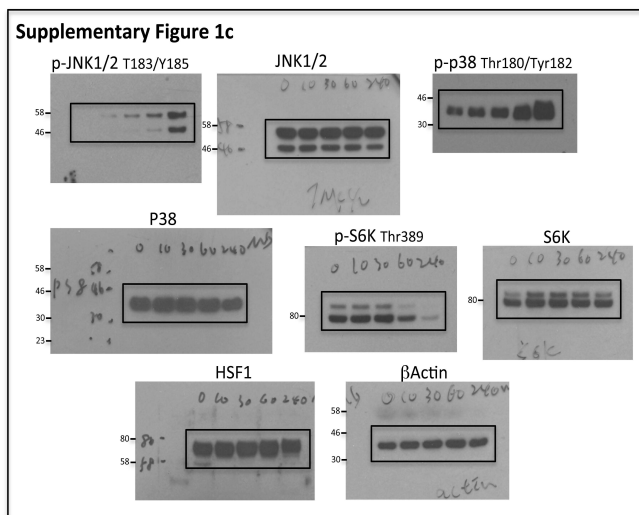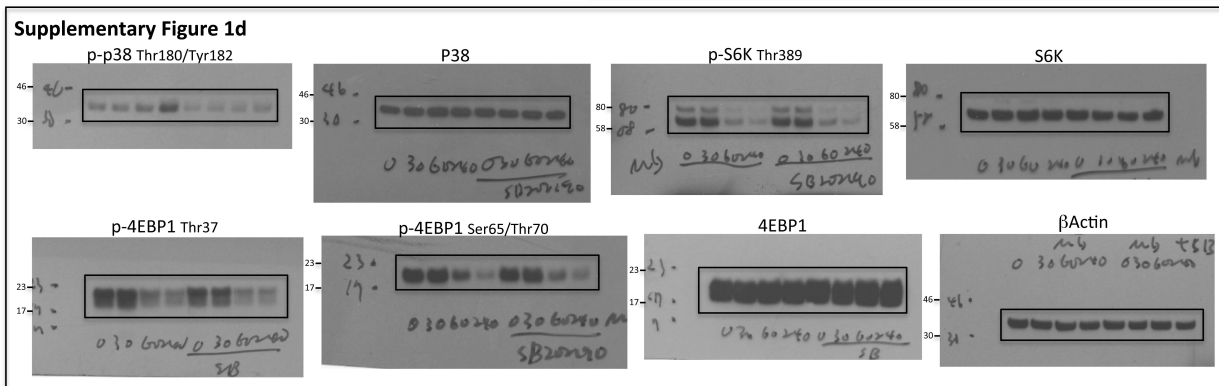

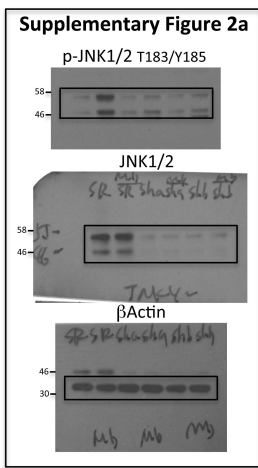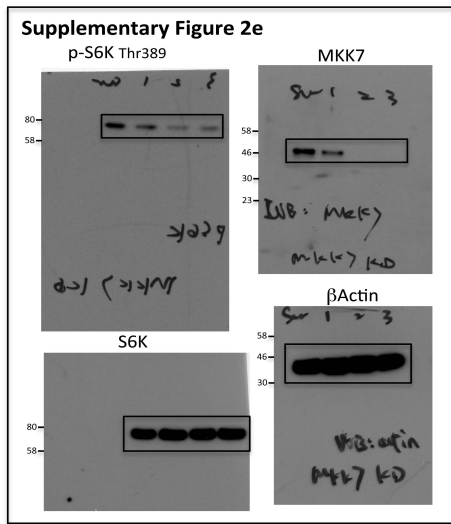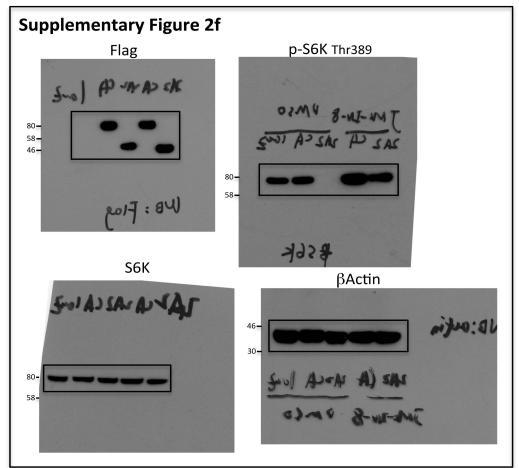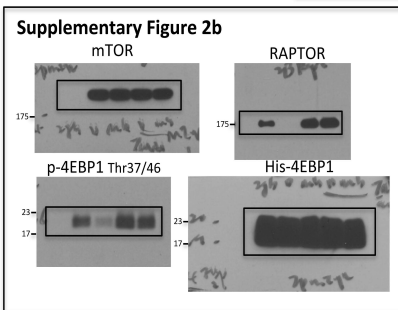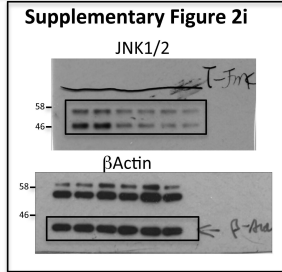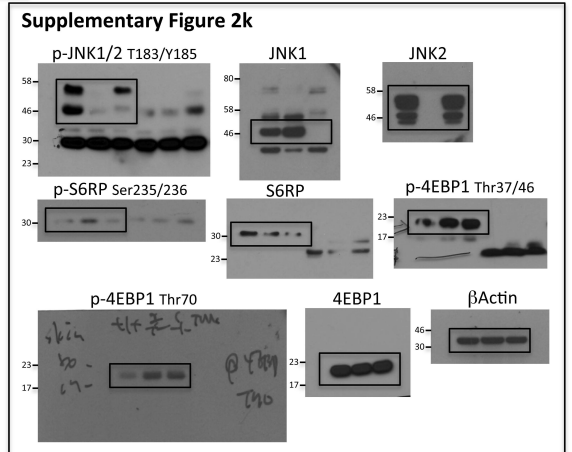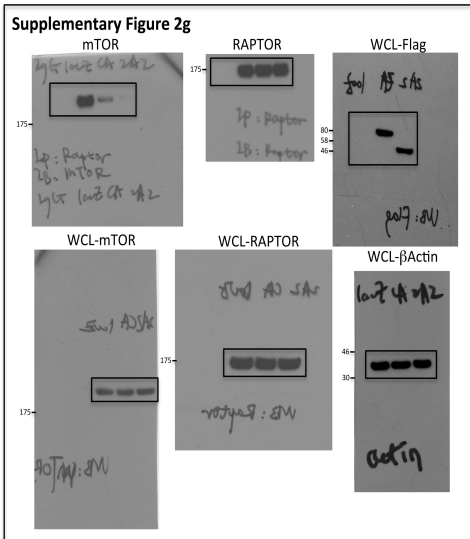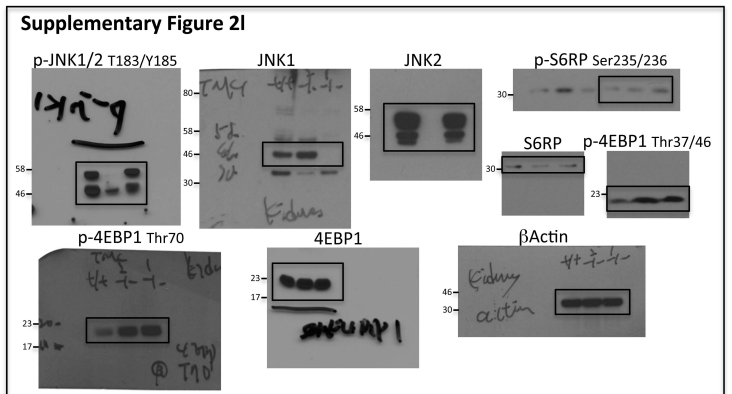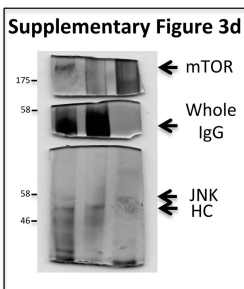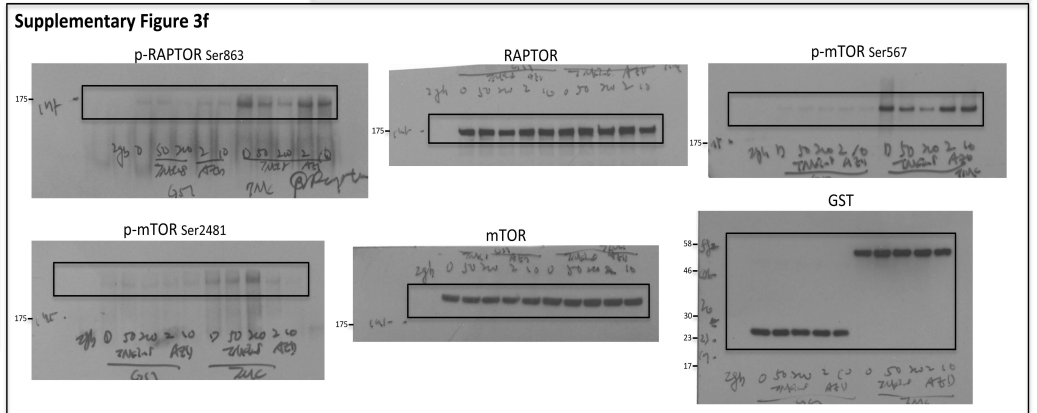

Supplement: NIHMS765517-supplement-9.pdf [file NIHMS765517-supplement-9.pdf]
